# Supplementary material for: The Use of Technology for Communicating With Clinicians or Seeking Health Information in a Multilingual Urban Cohort: Cross-Sectional Survey
Source: PubMed Central journal article supplement (PMC7171563; doi:10.2196/16951), 2020-04-06
Supplement: jmir_v22i4e16951_app1.pdf [file jmir_v22i4e16951_app1.pdf]

# SF HINTS ENGLISH Questionnaire

Record ID \_\_\_\_\_

---

**Thank you again for agreeing to participate in the SF HINTS study. SF HINTS is a study being conducted by researchers at the UCSF Cancer Center and Zuckerberg San Francisco General Hospital to better understand cancer communication needs for the diverse communities of San Francisco. This study is funded by the National Cancer Institute. The goal of this study is to ask questions about how you get information about cancer and your general health. These questions will be used by researchers in the future to determine how to make information and treatment for cancer more accessible to vulnerable populations in San Francisco. The survey will take about 35 min. Do you have a few minutes to talk with me now?**

**If yes, read:**

**Thank for taking the time to speak with me. Before I get started, as part of the research process, I want to make sure to acquire formal verbal consent. If you agree to participate in this interview, I will ask you some questions about access to healthcare, cancer screening and demographic information. It is your decision whether you want to participate and you may skip questions at any time.**

**While there will be no direct benefit to you by participating in this study, your responses will help us learn more about how we can better structure access to their healthcare. A small token of appreciation in the form of a \$25 upon completion of the survey is given to participants who complete the survey.**

**Do you understand and agree to take part in this interview?**

**If you have any questions about the study, you can call Dr. Urmimala Sarkar at (415) 340-3736 to talk about the study. You can reach the UCSF IRB office at (415) 476-1814, 8 am to 5 pm, Monday through Friday.**

**We appreciate your time and effort in helping us with this research study.  
Do you have any questions before we begin?**

Willing to participate in survey?

- Accept  
 Refuse

---



---

## A. Health Information Seeking

A1. Have you ever looked for information about health or medical topics from any source?

- Yes  
 No  
 Don't know  
 Refused

A2. The most recent time you looked for information about health or medical topics, where did you go first? [IF PARTICIPANT HAS MADE MORE THAN ONE SEARCH, ASK FOR THE MOST RECENT SEARCH.]

- Books  
 Brochures, pamphlets, etc  
 Cancer organization  
 Family  
 Friend/Coworker  
 Health care provider  
 Internet  
 Library  
 Magazines  
 Newspapers  
 Telephone information number (1-800 Number)  
 Complementary or alternative, practitioner  
 Social media site, such as Facebook, PatientsLikeMe, Caring Bridge  
 Other  
 Don't know  
 Refused

A2. If Other, specify

A3. If a provider wants to give you more information about your health such as how to prepare for a procedure or education on how to improve your health would you prefer to receive it via:

- Email  
 Brochures, pamphlets, etc  
 Text message  
 DVD mailed to your home  
 Patient Portal  
 No preference  
 Don't know  
 Refused

---



---

## B. Health Information Access

B1. Overall, how confident are you that you could get health-related advice or information if you needed it? Would you say. . .

- Completely confident  
 Very confident  
 Somewhat confident  
 A little confident  
 Not confident at all  
 Don't know  
 Refused

---



---

**B2. Based on the results of your most recent search for information about health or medical topics, how much do you agree or disagree with the following statements?**

|                                                                | Strongly agree        | Somewhat agree        | Somewhat disagree     | Strongly disagree     | DON'T KNOW            | REFUSED               |
|----------------------------------------------------------------|-----------------------|-----------------------|-----------------------|-----------------------|-----------------------|-----------------------|
| a. It took a lot of effort to get the information you needed.  | <input type="radio"/> | <input type="radio"/> | <input type="radio"/> | <input type="radio"/> | <input type="radio"/> | <input type="radio"/> |
| b. You felt frustrated during your search for the information. | <input type="radio"/> | <input type="radio"/> | <input type="radio"/> | <input type="radio"/> | <input type="radio"/> | <input type="radio"/> |
| c. You were concerned about the quality of the information.    | <input type="radio"/> | <input type="radio"/> | <input type="radio"/> | <input type="radio"/> | <input type="radio"/> | <input type="radio"/> |
| d. The information you found was hard to understand.           | <input type="radio"/> | <input type="radio"/> | <input type="radio"/> | <input type="radio"/> | <input type="radio"/> | <input type="radio"/> |

B3. Do you currently have a Smart phone such as an iPhone, Android, Blackberry or Windows phone?

- Yes  
 No

B4. In the past 12 months, have you used any of the following to exchange medical information with a health care professional? Mark all that apply.

- Email  
 Text message  
 App on a smart phone or mobile device  
 Video conference (e.g., Skype, Facetime, etc.)  
 Social media (e.g., Facebook, Google+, CaringBridge, WeChat, etc.)  
 Instant messaging applications (E.g. WhatsApp, WeChat, etc.)  
 Fax  
 None

B5. Sometimes people use the Internet to connect with other people online through social networks like Facebook or Twitter. This is often called "social media."

In the last 12 months, have you used the Internet for any of the following reasons?

- Visited a social networking site, such as Facebook or LinkedIn  
 Shared health information on social networking sites, such as Facebook or Twitter  
 Wrote in an online diary or blog (i.e., Web log)  
 Participated in an online forum or support group for people with a similar health or medical issue  
 Watched a health-related video on YouTube  
 None

---



---

**C. Health Literacy**

C1. How often do you need to have someone help you when you read instructions, pamphlets, or other written material from your doctor or pharmacy?

- Never  
 Rarely  
 Sometimes  
 Often  
 Always  
 Do not know  
 Refused

C2. How confident are you filling out medical forms by yourself?

- Extremely  
 Quite a bit  
 Somewhat  
 A little  
 Not at all  
 Do not know  
 Refused  
 Does not apply, I don't fill out forms

## D. General Health Status (Mental Health)

D1. In general, would you say your health is:

- Excellent  
 Very good  
 Good  
 Fair  
 Poor

## D2. Has a doctor or other health professional ever told you that you had any of the following medical conditions:

|                                                                                 | Yes                   | No                    |
|---------------------------------------------------------------------------------|-----------------------|-----------------------|
| a. Diabetes or high blood sugar?                                                | <input type="radio"/> | <input type="radio"/> |
| b. High blood pressure or hypertension?                                         | <input type="radio"/> | <input type="radio"/> |
| c. A heart condition such as heart attack, angina, or congestive heart failure? | <input type="radio"/> | <input type="radio"/> |
| d. Chronic lung disease, asthma, emphysema, or chronic bronchitis?              | <input type="radio"/> | <input type="radio"/> |
| e. Arthritis or rheumatism?                                                     | <input type="radio"/> | <input type="radio"/> |
| f. Depression or anxiety disorder?                                              | <input type="radio"/> | <input type="radio"/> |

## D3. Over the past 2 weeks, how often have you been bothered by any of the following problems?

|                                                | Not at all            | Several days          | More than half the days | Nearly every day      |
|------------------------------------------------|-----------------------|-----------------------|-------------------------|-----------------------|
| a. Little interest or pleasure in doing things | <input type="radio"/> | <input type="radio"/> | <input type="radio"/>   | <input type="radio"/> |
| b. Feeling down, depressed or hopeless         | <input type="radio"/> | <input type="radio"/> | <input type="radio"/>   | <input type="radio"/> |

D4. About how tall are you without shoes?

\_\_\_\_\_ (a. feet)

\_\_\_\_\_ (b. inches)

D5. About how much do you weigh, in pounds, without shoes?

\_\_\_\_\_ (pounds)

---



---

**E. Health Behaviors (Tobacco Products, E-cigarettes, Second Hand Smoke, Alcohol Consumption, Physical Activity, Sun Exposure, Hepatitis)**

E1. Have you ever smoked at least 100 cigarettes in your entire life?

- Yes  
 No

E2. Do you now smoke cigarettes:

- Every day  
 Somedays  
 Not at all  
 Don't know  
 Refused

E3. Do you now use e-cigarettes or other electronics, such as vaping, products every day, some days, or not at all?

- Every day  
 Somedays  
 Not at all  
 Don't know  
 Refused

E4. During the past 7 days, that is, since last [TODAY DATE OF WEEK], on how many days did you breathe the smoke from someone else who was smoking in an indoor or outdoor public place?

- \_\_\_\_\_
- None  
 Don't know  
 Refused

E5. Now, thinking of your overall drinking in the last 12 months, how often do you usually have any kind of beverage containing alcohol -- whether it is wine, beer, whiskey, coolers, or any other drink? Is it: (IF NECESSARY, ASK: If you had to average it over the last twelve months, how often would it be?)

- More than once a day  
 Once a day  
 Nearly every day  
 Three or four times a week  
 Once or twice a week  
 Two or three times a month  
 About once a month  
 Less than once a month but at least once a year  
 Less than once a year, or  
 Never had any kind of beverage containing alcohol, or  
 Have you ever had wine?  
 Do not know  
 Refused

E6. During the past month, other than your regular job, did you participate in any physical activities or exercises such as running, golf, gardening, or walking for exercise?

- Yes  
 No  
 Don't Know  
 Refused

---

---

**E7. When you go outside on a very sunny day, for more than one hour, how often do you:**

- a. stay in the shade?
- Never  
 Rarely  
 Sometimes  
 Most of the time  
 Always  
 Do not know  
 Refused
- b. wear a hat that shades your face ears and neck?
- Never  
 Rarely  
 Sometimes  
 Most of the time  
 Always  
 Do not know  
 Refused
- c. wear a long sleeved shirt?
- Never  
 Rarely  
 Sometimes  
 Most of the time  
 Always  
 Do not know  
 Refused
- d. use sunscreen?
- Never  
 Rarely  
 Sometimes  
 Most of the time  
 Always  
 Do not know  
 Refused

Now I am going to ask you about tests for bloodborne viruses.

Hepatitis is an inflammation of the liver caused by viruses such as hepatitis A, B, or C. The infection can make the skin and eyes turn yellow.

- Yes  
 No  
 Don't Know  
 Refused

E8. Have you ever had a blood test to check for hepatitis B?

E9. Have you ever had a blood test to check for hepatitis C?

- Yes  
 No  
 Don't Know  
 Refused

---

---

**F. Medical Research**

F1. Have you ever been asked to participate in a clinical trial or medical research?

- Yes  
 No  
 Don't Know  
 Refused

F2. Do you think that patients should be asked to take part in medical research?

- Yes  
 No  
 Don't Know  
 Refused

F3. Have you ever been asked to donate bio specimens (blood, saliva, or other tissue) for the purpose of medical research?

- Yes  
 No  
 Don't Know  
 Refused

F4. Suppose that you were asked to take part in research study comparing two treatments, both of which were suitable for your illness. Would you be prepared to take part in a study comparing different treatments?

- Yes  
 No  
 Don't Know  
 Refused

## G. Healthcare Access

G1. Is there a place that you USUALLY go to when you are sick or need advice about your health?

- Yes  
 There is NO place  
 There is MORE THAN ONE place  
 Don't know  
 Refused

G2. What kind of place do you go most often?

- Clinic or health center  
 Doctor's office or HMO  
 Hospital emergency room  
 Hospital outpatient department  
 Some other place  
 DOESN'T GO TO ONE PLACE MOST OFTEN  
 Don't know  
 Refused

G3. What is the name of the place?

- Castro-Mission Health Clinic  
 Chinatown Public Health Center  
 Curry Senior Center  
 Family Health Center at ZSFG  
 Housing and Urban Health Clinic  
 Laguna Honda Hospital  
 Larkin Street Medical Center  
 Maxine Hall Health Center  
 Ocean Park Health Center  
 Potrero Hill Health Center  
 San Francisco City Clinic  
 Silver Avenue Family Health Center  
 Southeast Health Center  
 Tom Waddell Health Center  
 Zuckerberg San Francisco General Hospital  
 Glide Health Services  
 Haight-Ashbury Free Medical Clinic  
 Lyon-Martin Women's Health Services  
 Mission Neighborhood Health Center  
 Native American Health Center  
 North East Medical Services  
 San Francisco Free Clinic  
 South of Market Health Center  
 St. Anthony Free Medical Clinic  
 Women's Community Health Center  
 Some other place (please specify)  
 Don't know  
 Refused

G3a. If other, please describe

\_\_\_\_\_

G4. An HIV test checks whether someone has the virus that causes AIDS.

- Yes  
 No  
 Don't Know  
 Refused

At any time you were seen [by doctor, nurse, or other health professional] were you offered an HIV test?

G5. Do you have any kind of health care coverage, including health insurance, prepaid plans such as HMOs, government plans such as Medicare, or Indian Health Service?

- Yes  
 No  
 Don't Know  
 Refused

G6. What is the primary source of your health care coverage? Is it...PLEASE READ

- A plan purchased through an employer or union (includes plans purchased through another person's employer)  
 A plan that you or another family member buys on your own  
 Medicare  
 Medicaid or other state program  
 TRICARE (formerly CHAMPUS), VA, or Military  
 Alaska Native, Indian Health Service, Tribal Health Services  
 Some other source  
 None (no coverage)  
 Don't know  
 Refused

G7. In the past 12 months was there a time when you needed to see a doctor, but could not because of cost?

- Yes  
 No  
 Don't Know  
 Refused

G8. What are the main reasons you did not get medical care? Check all that apply.

- Cost [Include no insurance]  
 Distance  
 Office wasn't open when I could get there  
 Too long a wait for an appointment  
 No care available for child, disabled, or elderly person I care for  
 No transportation  
 No access for people with disabilities  
 The medical provider didn't speak my language  
 I could not get time off of work to go  
 Other (specify)  
 Don't know  
 Refused

G8a. If other, please describe

---

G9. In the past 12 months, not counting times you went to an emergency room, how many times did you go to a doctor, nurse, or other health professional to get care for yourself?

- None  
 1 time  
 2 times  
 3 times  
 4 times  
 5-9 times  
 10 or more times

G10. Overall, how would you rate the quality of health care you received in the past 12 months?

- Excellent  
 Very good  
 Good  
 Fair  
 Poor  
 I did not receive healthcare in the last 12 months.



---

---

## H. Sociodemographics

We are about half way through the survey.

H1. What is your age?

- 18
- 19
- 20
- 21
- 22
- 23
- 24
- 25
- 26
- 27
- 28
- 29
- 30
- 31
- 32
- 33
- 34
- 35
- 36
- 37
- 38
- 39
- 40
- 41
- 42
- 43
- 44
- 45
- 46
- 47
- 48
- 49
- 50
- 51
- 52
- 53
- 54
- 55
- 56
- 57
- 58
- 59
- 60
- 61
- 62
- 63
- 64
- 65
- 66
- 67
- 68
- 69
- 70
- 71
- 72
- 73
- 74
- 75
- 76
- 77
- 78
- 79
- 80
- 81
- 82
- 83
- 84
- 85
- 86
- 87

- 88
  - 89
  - 90
  - Don't Know
  - Refused
- (Years old )

H2. Are you of Hispanic, Latino/a, or Spanish Origin?  
If Yes, are you-

- Mexican, Mexican American, Chicano/a
- Puerto Rican
- Cuban
- Other
- No
- Don't know
- Refused

H3. Which of the following describes your race? You can select as many as apply. Are you  
Mark all that apply

- White or Caucasian
- Black or African American
- American Indian or Alaska Native
- Asian Indian
- Chinese
- Filipino
- Japanese
- Korean
- Vietnamese
- Other Asian
- Native Hawaiian
- Guamanian or Chamorro
- Samoan
- Other Pacific Islander
- Other
- Don't know/Not sure
- Refused

H3a. If Other, please describe

\_\_\_\_\_

H4. How well do you speak English? Would you say:

- Not at all
- Not well
- Well
- Very Well
- Poor

H5. What is your marital status? Would you say:  
NOTE: Living as married is the legal basis for common law marriage: two people cohabitating together, regardless of romantic relationship.

- Married
- Domestic partnership
- Divorced
- Widowed
- Seperated, or
- Single, never been married?
- Living as married
- Don't Know
- Refused

H6. What is the highest grade or level of schooling you completed?

- Less than 8 years
- 8 through 11 years
- 12 years or completed high school
- Post high school training other than college (vocational or technical)
- Some college
- College graduate
- Postgraduate
- Don't know
- Refused

H7. Do you currently rent or own your home?  
NOTE: Home is defined as the place where you live most of the time/the majority of the year.

- Own  
 Rent  
 Occupied without paying monetary rent  
 Don't Know/Not sure  
 Refused

H8. What is the ZIP Code where you live?

\_\_\_\_\_

H9. Were you born in the United States?

- Yes  
 No  
 Don't Know  
 Refused

H10. In what year did you come to live in the United States?

\_\_\_\_\_

H11. Are you currently...?

- Employed  
 Unemployed  
 Homemaker  
 Student  
 Retired  
 Disabled  
 Employed - part time  
 Other  
 Don't know  
 Refused

H11a. If other, specify

\_\_\_\_\_

H12. Including yourself, how many people live in your household?

\_\_\_\_\_

H13. Thinking about members of your family living in this household, what is your combined annual income, meaning the total pre-tax income from all sources earned in the past year? Is it ....

- Less than \$10,000  
 \$10,000 to under \$15,000  
 \$15,000 to under \$20,000  
 \$20,000 to under \$35,000  
 \$35,000 to under \$50,000  
 \$50,000 to under \$75,000  
 \$75,000 to under \$100,000  
 \$100,000 to under \$200,000  
 \$200,000 or more  
 Don't know  
 Refused

H14. Which one of these phrases comes closest to your own feelings about your household's income these days?

- Living comfortably on present income  
 Getting by on present income  
 Finding it difficult on present income  
 Finding it very difficult on present income

H15. What is your current gender identity?

- Male  
 Female  
 Female-to-Male (FTM)/Transgender Male/Trans Man  
 Male-to-Female (MTF)/Transgender Female/ Trans Woman  
 Genderqueer, neither exclusively male nor female  
 Additional Gender Category/(or Other) (Please Specify)  
 Decline to answer, please explain why

H15a. Additional Gender Category/(or Other) (Please Specify); Decline to answer, please explain why

\_\_\_\_\_

H16. What sex were you assigned at birth on your original birth certificate (check only one)?

- Male  
 Female  
 Decline to answer, please explain why

H16a. Decline to answer, please explain why

\_\_\_\_\_

H17. How do you describe your sexual orientation or sexual identity

- Straight / Heterosexual  
 Bisexual  
 Gay / Lesbian / Same-Gender Loving  
 Questioning / Unsure  
 Not listed (Please Specify): \_\_\_\_\_  
 Decline to answer

If other, please describe:

\_\_\_\_\_

## I. Housing Stability

I1. In the past year, have you slept in the street, homeless shelter, or place not ordinarily used as a sleeping accommodation (bus shelter, storefront) because you had no other place to stay?

- Yes  
 No  
 Don't Know  
 Refused

I2. In the past YEAR, have you stayed/doubled up with friends or family, because you haven't had another place to stay?

- Yes  
 No  
 Don't Know  
 Refused

I3. In the past YEAR, have you lived in a single-room occupancy (SRO) hotel?

- Yes  
 No  
 Don't Know  
 Refused

## J. Beliefs about Cancer

Think about cancer in general when answering the questions in this section

J1. How much do you agree or disagree with each of the following statements?

|                                                                                                                                    | Strongly agree        | Somewhat agree        | Somewhat disagree     | Strongly disagree     |
|------------------------------------------------------------------------------------------------------------------------------------|-----------------------|-----------------------|-----------------------|-----------------------|
| a. It seems like everything causes cancer. Would you say you?                                                                      | <input type="radio"/> | <input type="radio"/> | <input type="radio"/> | <input type="radio"/> |
| b. There's not much you can do to lower your chances of getting cancer. Would you say you?                                         | <input type="radio"/> | <input type="radio"/> | <input type="radio"/> | <input type="radio"/> |
| c. There are so many different recommendations about preventing cancer, it's hard to know which ones to follow. Would you say you? | <input type="radio"/> | <input type="radio"/> | <input type="radio"/> | <input type="radio"/> |

- d. Cancer is most often caused by a person's behavior or lifestyle.
- e. When I think about cancer, I automatically think about death.

J2. Have you ever been diagnosed as having cancer?  Yes  
 No

J3. What type of cancer did you have? Mark all that apply.

- Bladder cancer  
 Bone cancer  
 Breast cancer  
 Cervical cancer (cancer of the cervix)  
 Colon cancer  
 Endometrial cancer (cancer of the uterus)  
 Head and neck cancer  
 Hodgkin's lymphoma  
 Leukemia/Blood cancer  
 Liver cancer  
 Lung cancer  
 Melanoma  
 Non-Hodgkin lymphoma  
 Oral cancer  
 Ovarian cancer  
 Pancreatic cancer  
 Pharyngeal (throat) cancer  
 Prostate cancer  
 Rectal cancer  
 Renal (kidney) cancer  
 Skin cancer, non-melanoma  
 Stomach cancer  
 Other

J4. Have any of your family members ever had cancer?  Yes  
 No  
 Not sure

---

## K. Awareness of Cancer Risk

K1. Compared to other people your age, how likely are you to get cancer in your lifetime? Would you say you are

- Very unlikely  
 Unlikely  
 Neither unlikely nor likely  
 Likely  
 Very likely  
 Don't know  
 Refused

K2. I'd rather not know my chance of getting cancer.

- Strongly agree  
 Somewhat agree  
 Somewhat disagree  
 Strongly disagree  
 Don't know  
 Refused

---

---

**L. Breast and Cervical Cancer Screening****If male go to the next section.**

L1. A mammogram is an x-ray of each breast to look for breast cancer. Have you ever had a mammogram?

- Yes  
 No  
 Don't Know  
 Refused

L2. How long has it been since you had your last mammogram?

- Within the past year (anytime less than 12 months ago)  
 Within the past 2 years (1 year but less than 2 years ago)  
 Within the past 3 years (2 years but less than 3 years ago)  
 Within the past 5 years (3 years but less than 5 years ago)  
 5 or more years ago  
 Don't Know  
 Refused

L3. A Pap test is a test for cancer of the cervix. Have you ever had a Pap test?

- Yes  
 No  
 Don't Know  
 Refused

L4. How long has it been since you had your last Pap test?

- Within the past year (anytime less than 12 months ago)  
 Within the past 2 years (1 year but less than 2 years ago)  
 Within the past 3 years (2 years but less than 3 years ago)  
 Within the past 5 years (3 years but less than 5 years ago)  
 5 or more years ago  
 Don't Know  
 Refused

Now, I would like to ask you about the Human Papillomavirus (Pap.uh.loh.muuh virus) or HPV test.

L5. How many HPV shots did you receive?

- 0  
 1  
 2  
 All shots (3)  
 Don't know/not sure  
 Refused

L6. Have you had a hysterectomy? Read if necessary: A hysterectomy is an operation to remove the uterus (womb).

- Yes  
 No  
 Don't Know  
 Refused

---

---

**M. Prostate Cancer Screening****If respondent is < 39 years of age, or is female, go to next section.**

Now, I will ask you some questions about prostate cancer screening. A Prostate-Specific Antigen test, also called a PSA test is a blood test used to check men for prostate cancer.

- Yes
- No

M1. Have you ever had a PSA test?

M2. How long has it been since you had your last PSA test?

- Within the past year (anytime less than 12 months ago)
- Within the past 2 years (1 year but less than 2 years ago)
- Within the past 3 years (2 years but less than 3 years ago)
- Within the past 5 years (3 years but less than 5 years ago)
- 5 or more years ago
- Don't Know
- Refused

M3. Has a MD or Nurse ever talked to you about whether you should or should not have a PSA test?

- Yes
- No

M4. What was the MAIN reason you had this PSA test, was it ?

- Part of a routine exam
- Because of a prostate problem
- Because of a family history of prostate cancer
- Because you were told you had prostate cancer
- Some other reason
- Don't Know
- Refused

## N. Colorectal Cancer Screening

**If respondent is < 49 years of age, go to next section.**

If respondent is < 49 years of age, go to next section.  
The next questions are about colorectal cancer screening.

- Yes
- No
- Don't Know
- Refused

N1. A blood stool test, (sometimes called FOBT or FIT) is a special test done at home to determine whether the stool contains blood. It is used to look for small amounts of blood in your stool that could come from colon cancers or other health problems. Have you ever had a blood stool test to screen for cancer?

N2. How long has it been since you had your last blood stool test using a home kit?

- Within the past year (anytime less than 12 months ago)
- Within the past 2 years (1 year but less than 2 years ago)
- 2 or more years
- Don't Know
- Refused

N3. Sigmoidoscopy and colonoscopy are exams in which a tube is inserted in the rectum to view the colon for signs of cancer or other health problems. Have you ever had either of these exams?

- Yes
- No
- Don't Know
- Refused



N4. For a SIGMOIDOSCOPY, a flexible tube is inserted into the rectum to look for problems. A COLONOSCOPY is similar, but uses a longer tube, and you are usually given medication through a needle in your arm to make you sleepy and told to have someone else drive you home after the test. Was your MOST RECENT exam a sigmoidoscopy or a colonoscopy?

- Sigmoidoscopy
- Colonoscopy
- Don't Know
- Refused

N5. How long has it been since you had your last sigmoidoscopy or colonoscopy?

- Within the past 10 years
- 10 or more years ago
- Don't Know
- Refused

---

---

## O. Knowledge of Cancer Screening

Just two more questions.

O1. At what age are most women supposed to start having mammograms?

NOTE: IF RESPONDENT SAYS, "WHEN A DOCTOR SAYS TO," ASK FOR AN ESTIMATE OF THE AGE.

O2. At what age are most people supposed to start doing home blood stool tests, having a sigmoidoscopy or having a colonoscopy? NOTE: IF RESPONDENT SAYS, "WHEN A DOCTOR SAYS TO," ASK FOR AN ESTIMATE OF THE AGE.

- 1
- 2
- 3
- 4
- 5
- 6
- 7
- 8
- 9
- 10
- 11
- 12
- 13
- 14
- 15
- 16
- 17
- 18
- 19
- 20
- 21
- 22
- 23
- 24
- 25
- 26
- 27
- 28
- 29
- 30
- 31
- 32
- 33
- 34
- 35
- 36
- 37
- 38
- 39
- 40
- 41
- 42
- 43
- 44
- 45
- 46
- 47
- 48
- 49
- 50
- 51
- 52
- 53
- 54
- 55
- 56
- 57
- 58
- 59
- 60
- 61
- 62
- 63
- 64
- 65
- 66
- 67
- 68
- 69
- 70

- 71
- 72
- 73
- 74
- 75
- 76
- 77
- 78
- 79
- 80
- 81
- 82
- 83
- 84
- 85
- 86
- 87
- 88
- 89
- 90
- 91
- 92
- 93
- 94
- 95
- 96
- 97
- 98
- 99
- 100
- 101
- 102
- 103
- 104
- 105
- 106
- 107
- 108
- 109
- 110
- 111
- 112
- 113
- 114
- 115
- 116
- 117
- 118
- 119
- 120
- 121
- 122
- 123
- 124
- 125
- 126
- 127
- 128
- 129
- 130
- Don't Know
- Refused  
(Years old )

SURVEY COMPLETE. Return device to survey administrator.

---

Surveyor Initials
